# Supplementary figures and images for: Dicalcium nitride, Ca2N—a 2D "excess electron" compound; synthetic routes and crystal chemistry
Source: Royal Society of Chemistry journal article supplement (doi:10.1039/b001911i), 2000-01-01

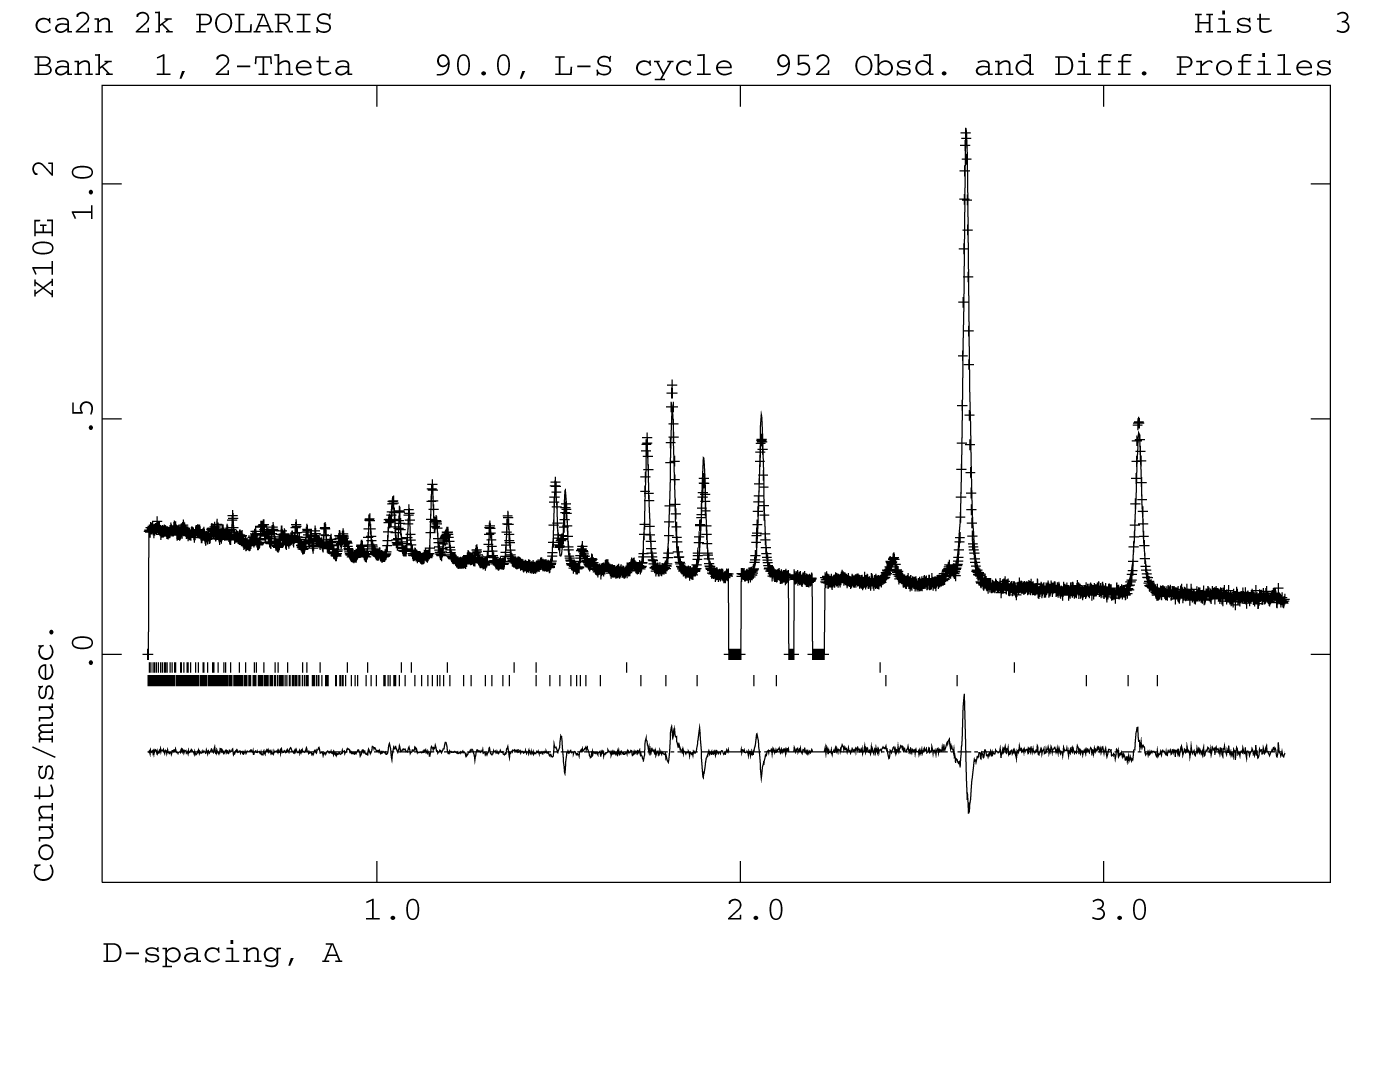

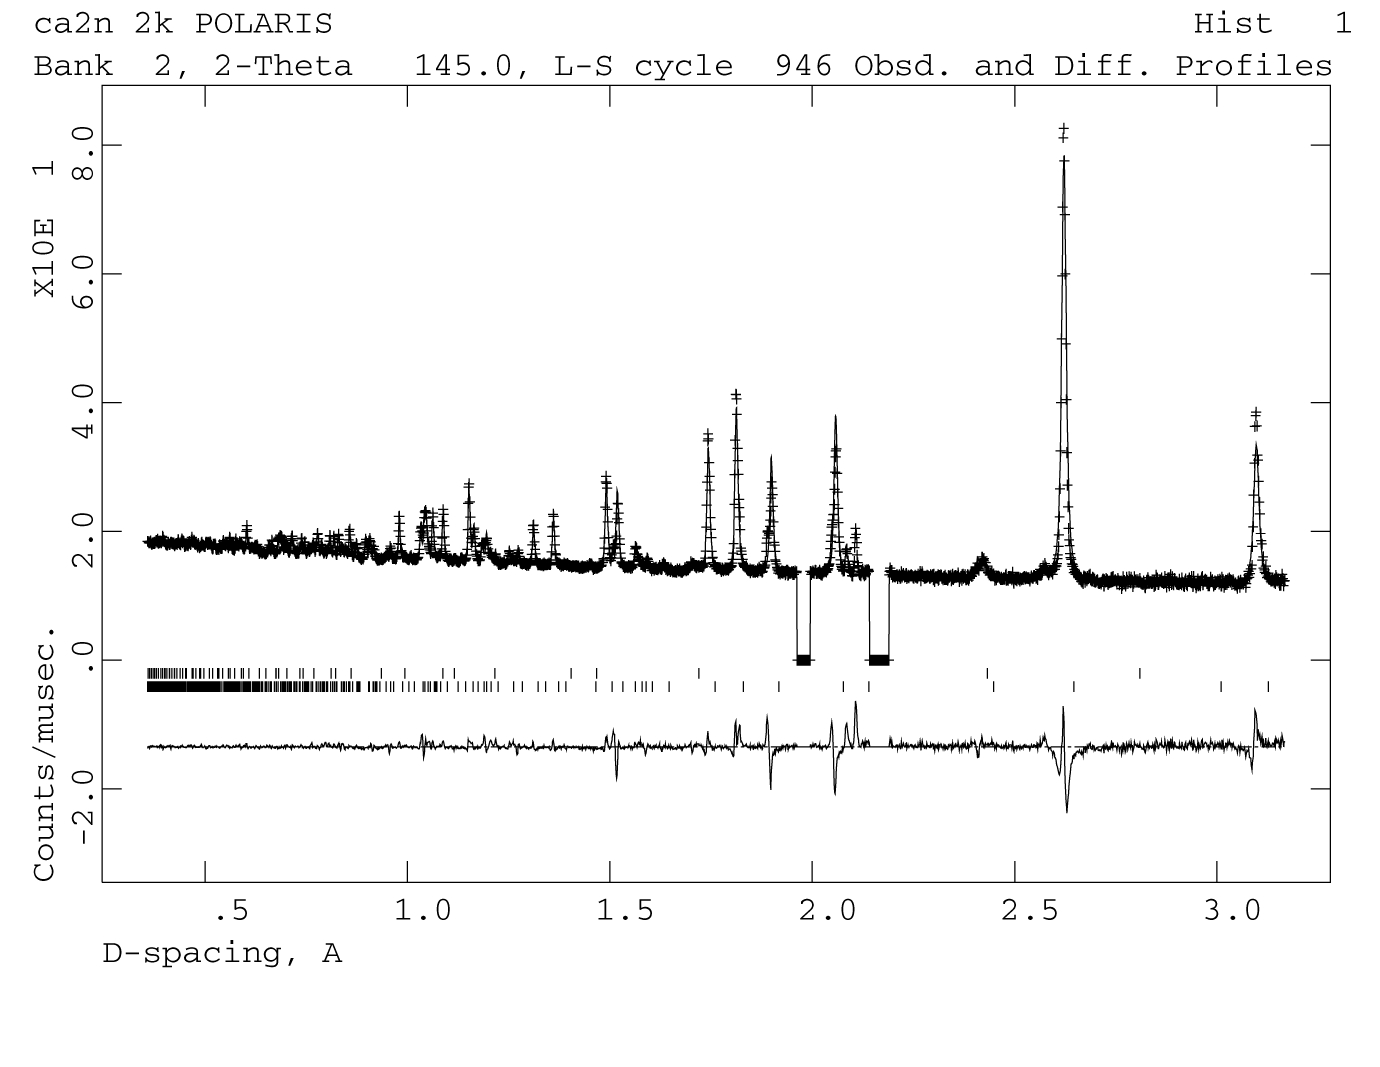

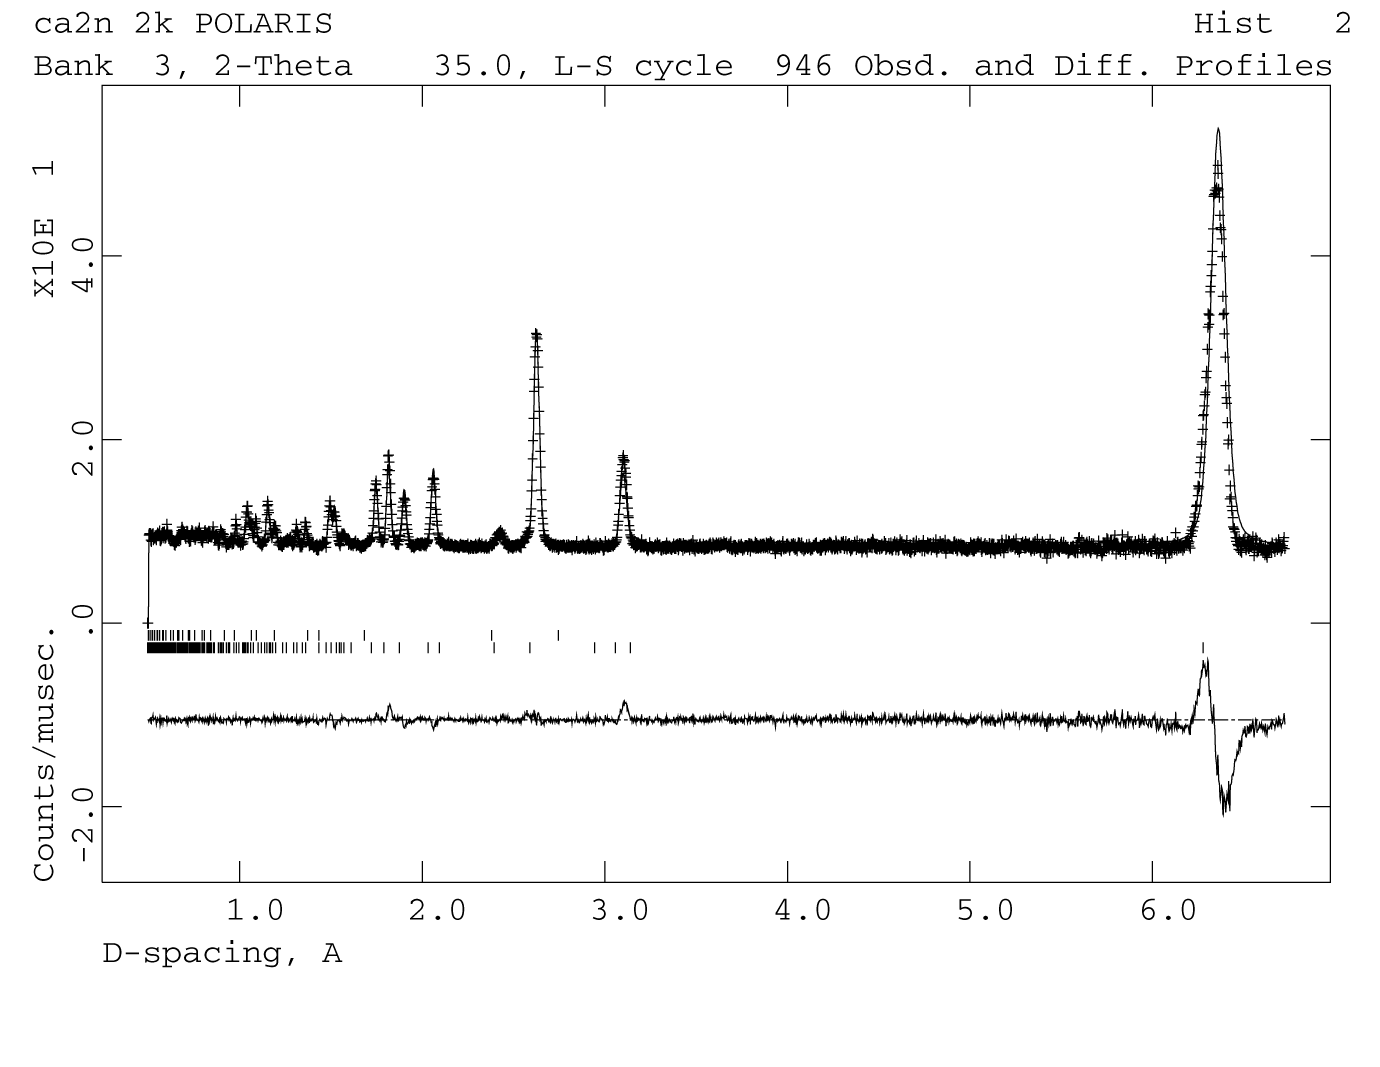

Supplement: b001911id.doc [file b001911id.doc]
